# Supplementary material
Source: PubMed Central journal article supplement (PMC2783967)
Supplement: NIHMS120601-supplement-Supple_Figures.pdf [file NIHMS120601-supplement-Supple_Figures.pdf]

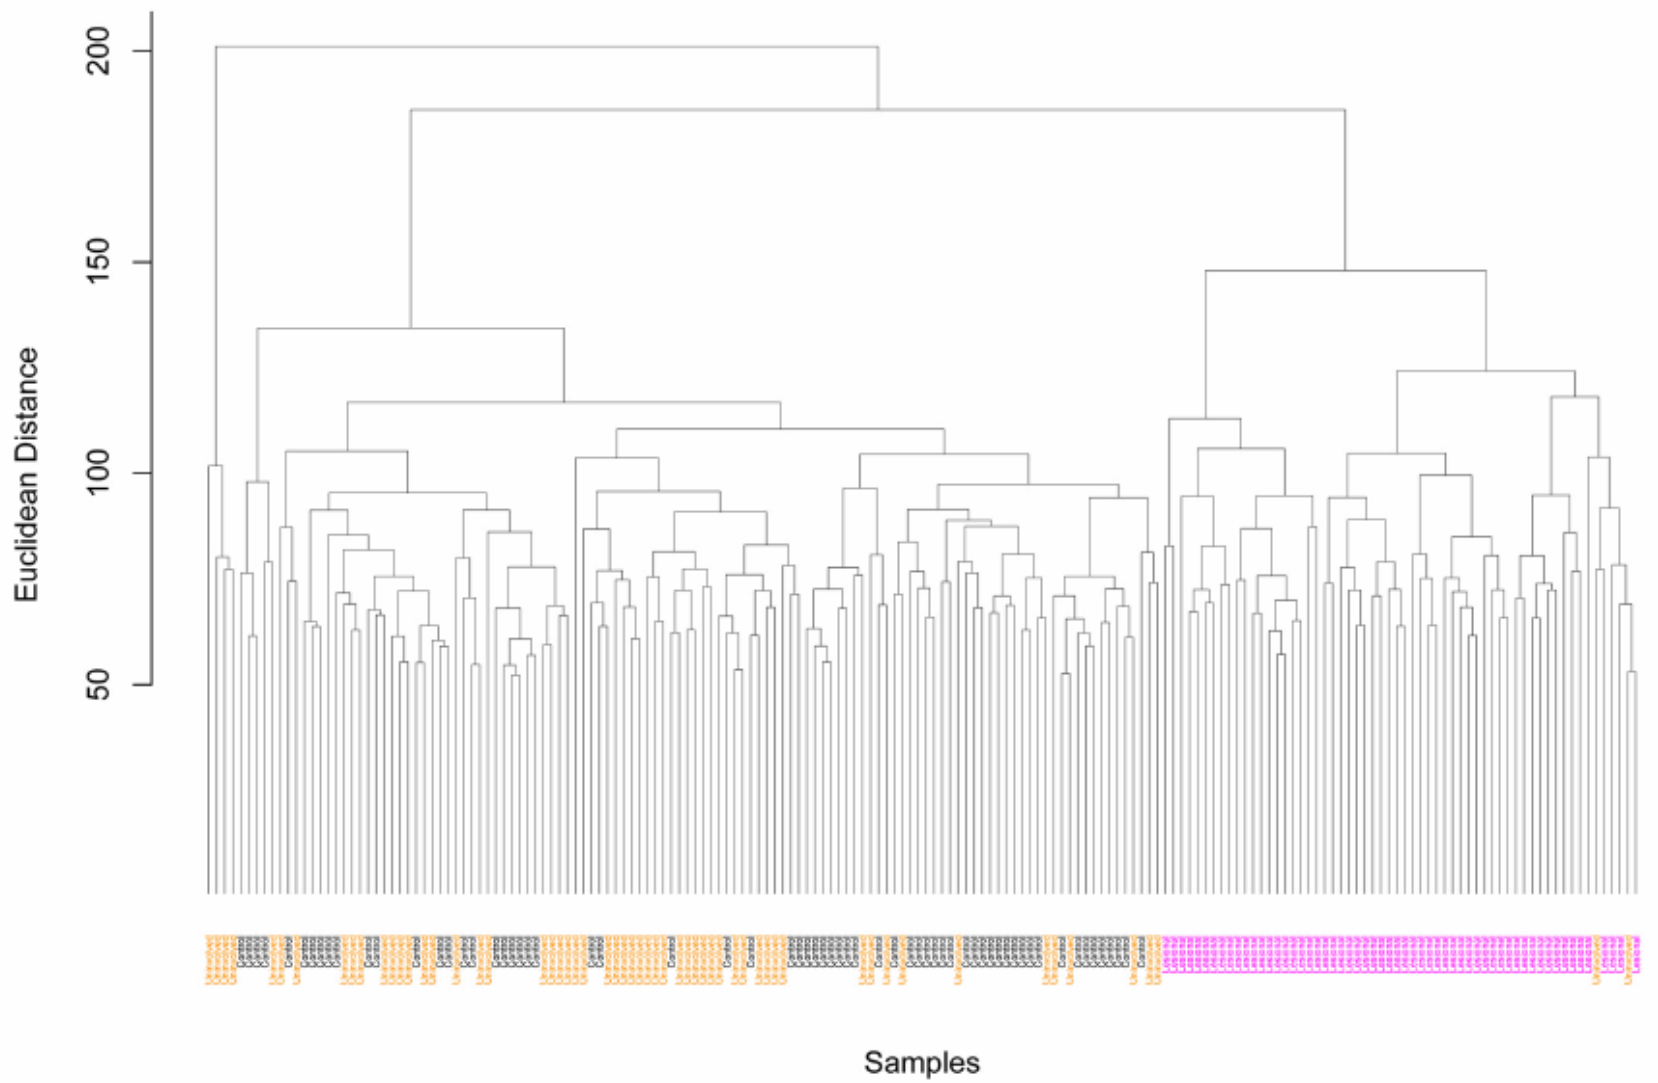

Supplemental Figure 1

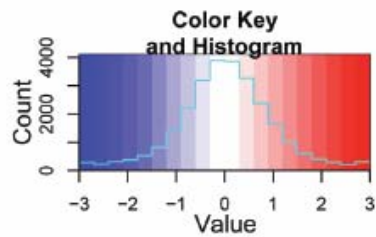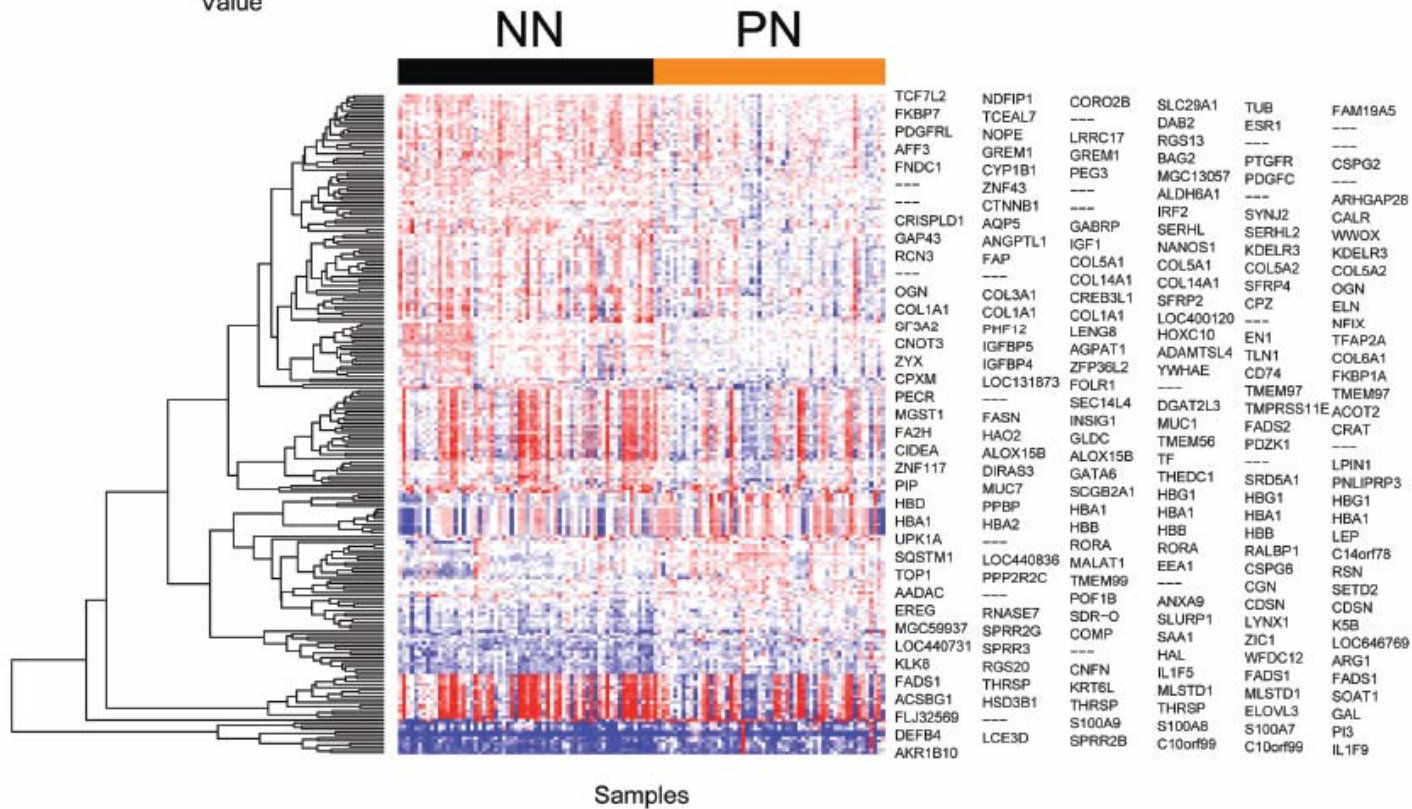

**Supplemental Figure 2 A**

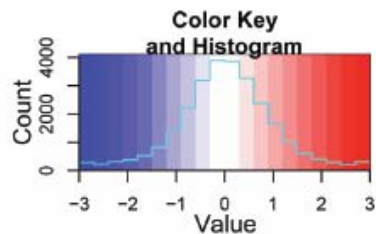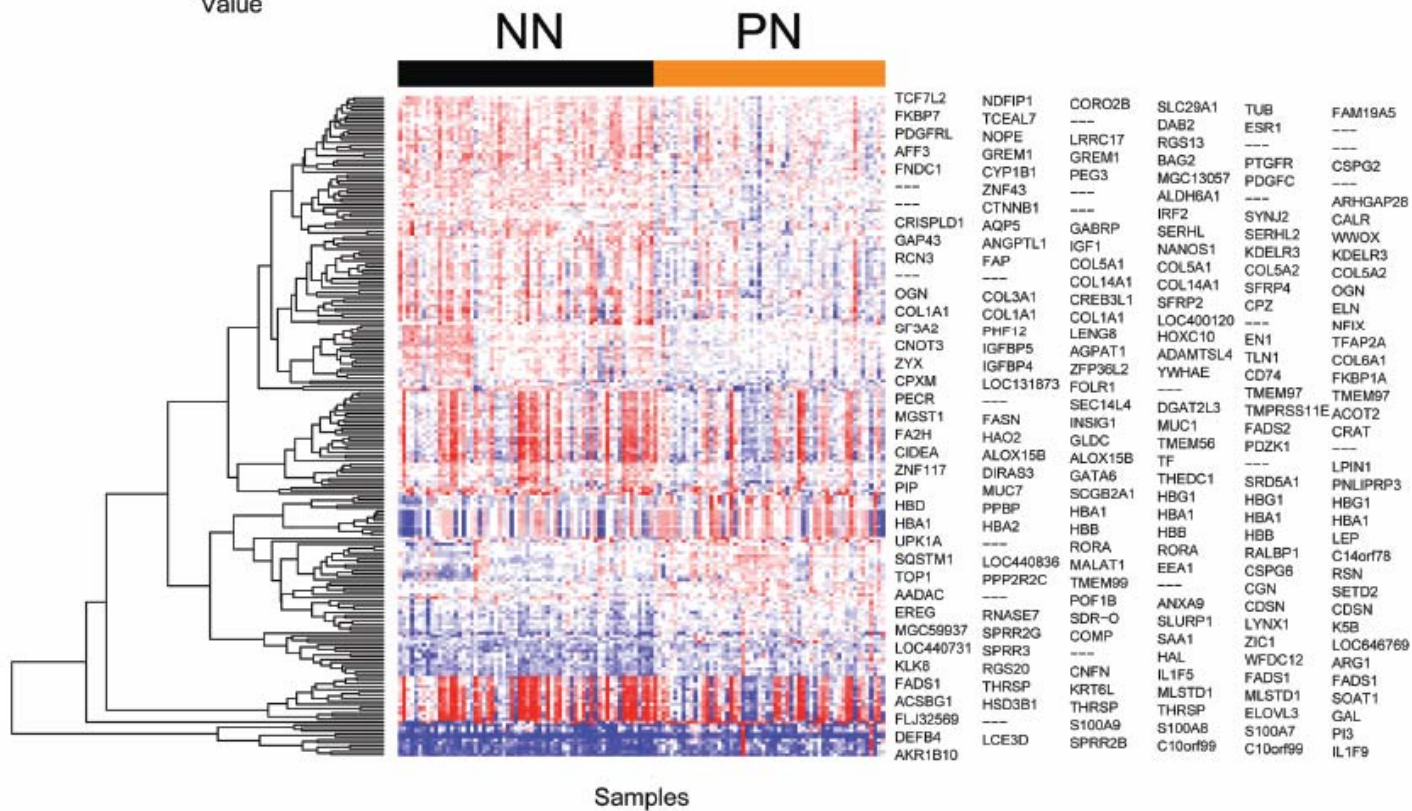

**Supplemental Figure 2 B**

## Relevant Functions & Diseases

|                  |                   |                                    |                                    |                                 |                                     |                                    |                    |               |
|------------------|-------------------|------------------------------------|------------------------------------|---------------------------------|-------------------------------------|------------------------------------|--------------------|---------------|
| Lipid Metabolism | Quantity          | Of 4-androstene-3,17-dione         | Of progesterone                    | Of beta-estradiol               | Of non-esterified fatty acid        | Of 1-alpha,25-Dihydroxy Vitamin D3 | Of triacylglycerol | Of fatty acid |
|                  | Metabolic Process | Metabolic process of lipid         | Metabolic process of fatty acid    | Metabolic process of eicosanoid | Metabolic process of AA acid        |                                    |                    |               |
|                  | Metabolism        | Metabolism of lipid                | Metabolism of fatty acid           | Metabolism of steroid           | Metabolism of long chain fatty acid | Metabolism of eicosanoid           |                    |               |
|                  | Modification      | Modification of fatty acid         | Modification of lipid              |                                 |                                     |                                    |                    |               |
|                  | Secretion         | Secretion of testosterone          |                                    |                                 |                                     |                                    |                    |               |
|                  | Formation         | Formation of testosterone          |                                    |                                 |                                     |                                    |                    |               |
|                  | Conversion        | Conversion of fatty acid           |                                    |                                 |                                     |                                    |                    |               |
|                  | Desaturation      | Desaturation of fatty acid         |                                    |                                 |                                     |                                    |                    |               |
|                  | Uptake            | Uptake of AA acid                  | Uptake of eicosanoid               | Uptake of lipid                 |                                     |                                    |                    |               |
|                  | Biosynthesis      | Biosynthesis of lipid              |                                    |                                 |                                     |                                    |                    |               |
|                  | Production        | Production of testosterone         |                                    |                                 |                                     |                                    |                    |               |
|                  | Synthesis         | Synthesis of long Chain fatty acid | Synthesis of fatty acid            | Synthesis of lipid              | Synthesis of cholesterol ester      | Synthesis of eicosanoid            |                    |               |
|                  | Accumulation      | Accumulation of lipid              |                                    |                                 |                                     |                                    |                    |               |
|                  | Moiety Attachment | Moiety attachment of lipid         | Moiety attachment of fatty acid    |                                 |                                     |                                    |                    |               |
|                  | Activation        | Activation of AA acid              | Activation of eicosapentenoic acid |                                 |                                     |                                    |                    |               |

Supplemental Figure 4

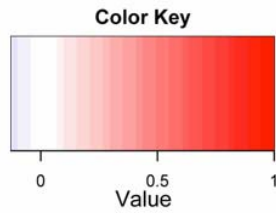

### Correlation of genes in defense response

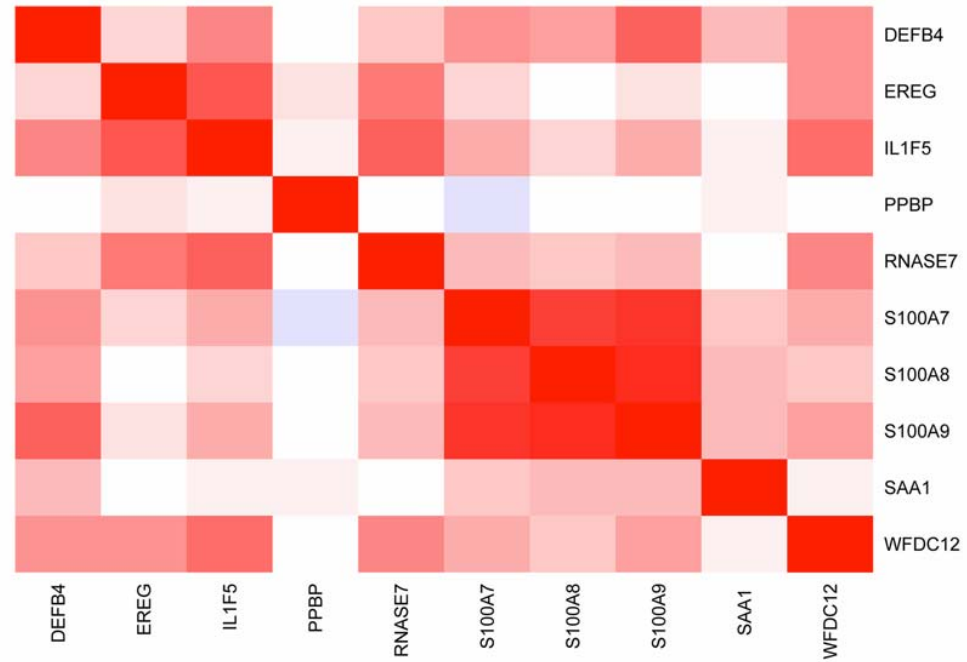

**Supplemental Figure 5**

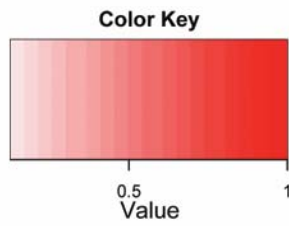

## Correlation of genes in keratinocyte differentiation

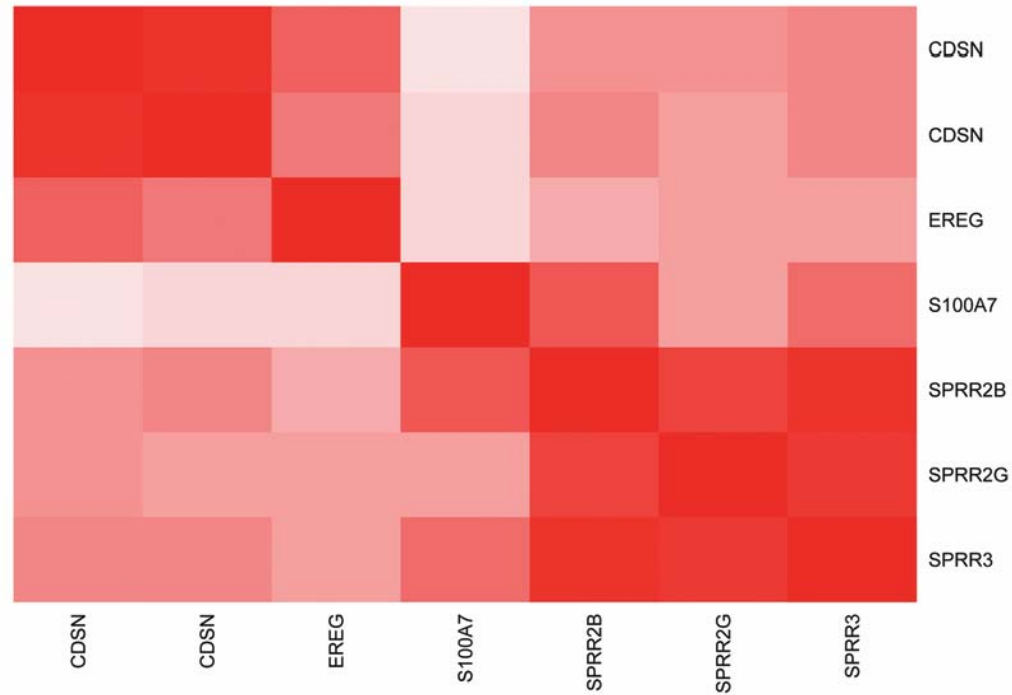

**Supplemental Figure 6**

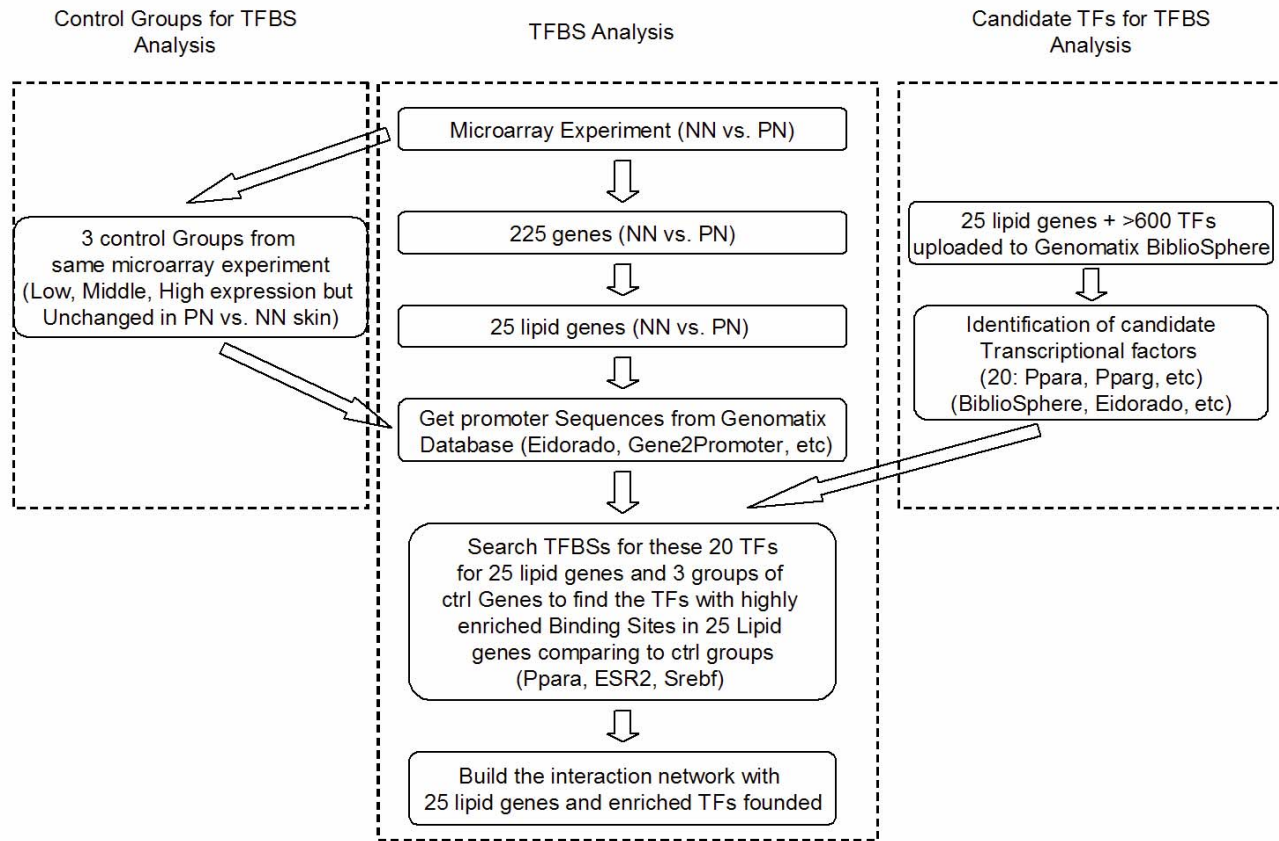

Flowchart for Transcriptional Factor Binding Site Analysis Using Genomatix

## Supplemental Figure 7

**Co-citation and Binding sites**

| <b>TFs</b>       |    |
|------------------|----|
| PPARA (V\$PERO)  | 12 |
| PPARG (V\$PERO)  | 9  |
| TP53 (V\$P53F)   | 8  |
| MYC (V\$EBOX)    | 8  |
| EGR1 (V\$EGRF)   | 7  |
| SP1 (V\$SP1F)    | 7  |
| ESR1 (V\$EREF)   | 6  |
| NR1I2 (V\$RXRF)  | 6  |
| AR (V\$GREF)     | 6  |
| SREBF1 (V\$SREB) | 6  |
| NFKB1 (V\$NFKB)  | 6  |
| WT1 (V\$EGRF)    | 5  |
| CREB1 (V\$CREB)  | 5  |
| ESR2 (V\$EREF)   | 5  |
| NR3C1 (V\$GREF)  | 5  |
| NR1I3 (V\$RXRF)  | 4  |
| STAT3 (V\$STAT)  | 4  |
| VDR (V\$RXRF)    | 4  |
| ATF3 (V\$CREB)   | 4  |
| HIF1A (V\$HIFF)  | 4  |
| STAT5A (V\$STAT) | 3  |

**Supplemental Table 1.**

Over-represented transcriptional binding sites in the lipid biosynthesis group.



| <b>GO terms for up-regulated genes</b> |                |                   |
|----------------------------------------|----------------|-------------------|
| <b>Name</b>                            | <b>p-value</b> | <b># of genes</b> |
| Keratinocytes Differentiation          | 9.2E-08        | 6                 |
| Keratinization                         | 6.6E-07        | 5                 |
| Epidermis Development                  | 4.7E-06        | 7                 |
| Epidermal Cell Differentiation         | 6.3E-06        | 5                 |
| Ectoderm Development                   | 7.8E-06        | 7                 |
| Epidermis Morphogenesis                | 1.1E-05        | 5                 |
| Oxygen Transport                       | 1.3E-05        | 4                 |
| Gas Transport                          | 2.0E-05        | 4                 |
| Tissue Morphogenesis                   | 5.6E-05        | 5                 |
| Multi-Organism Process                 | 5.6E-05        | 8                 |
| Defense Response                       | 8.2E-05        | 10                |
| Defense Response to Bacterium          | 1.4E-04        | 5                 |
| Response to External Stimulus          | 2.2E-04        | 18                |
| Response to Bacterium                  | 2.4E-04        | 5                 |
| Tissue Development                     | 6.6E-04        | 7                 |

| <b>GO terms for down-regulated genes</b> |                |                   |
|------------------------------------------|----------------|-------------------|
| <b>Name</b>                              | <b>p-value</b> | <b># of genes</b> |
| Lipid Metabolic Process                  | 1.0E-09        | 25                |
| Cellular Lipid Metabolic Process         | 4.8E-09        | 22                |
| Monocarboxylic Acid Metabolic Process    | 5.2E-09        | 15                |
| Carboxylic Acid Biosynthetic Process     | 5.7E-09        | 10                |
| Organic Acid Biosynthetic Process        | 5.7E-09        | 10                |
| Fatty Acid Metabolic Process             | 9.0E-09        | 13                |
| Fatty Acid Biosynthetic Process          | 3.3E-08        | 9                 |
| Lipid Biosynthetic Process               | 1.7E-07        | 14                |
| Carboxylic Acid Metabolic Process        | 2.6E-07        | 19                |
| Organic Acid Metabolic Process           | 2.8E-07        | 19                |
| Phosphate Transport                      | 4.7E-05        | 7                 |
| Inorganic Anion Transport                | 1.2E-03        | 7                 |
| Proximal/Distal Pattern Formation        | 1.7E-03        | 3                 |
| Anion Transport                          | 2.8E-03        | 7                 |
| Wnt Receptor Signaling Pathway           | 2.9E-03        | 6                 |

**Supplemental Table 2.**

GO terms for up- and down-regulated transcripts.
